# Supplementary material for: Phylogenetic Analyses of Shigella and Enteroinvasive Escherichia coli for the Identification of Molecular Epidemiological Markers: Whole-Genome Comparative Analysis Does Not Support Distinct Genera Designation
Source: Front Microbiol. 2016 Jan 19;6:1573. doi: 10.3389/fmicb.2015.01573 (PMC4718091; doi:10.3389/fmicb.2015.01573)
Supplement: TABLE S1 — Strain information includes NCBI identifier (SRA#), Tree label/Strain designation, genus and species with serotype, O or H antigens, additional strain identifiers and reference for source of genomes. [file Table_1.XLSX]

## Sheet: Sheet1
Supplemental Table 1
Accession	Tree label (Strain designation)	Genus and species	Additional strain identifiers	Reference
SRR2994187	SB serotype 19(1)	Shigella boydii serotype 19	BS984, 2010C-3226	CFSAN database
SRR2994188	SB serotype 19(2)	Shigella boydii serotype 19	2011C-3021	CFSAN database
CP011416	EIEC-O96:H19	Escherichia coli O96:H16		Escher et al. Epidemiol. Infect. 142 (12). 2559-2566 (2014).
ERR028673	SS-Lineage II_(3)	Shigella sonnei		Holt et al. Nature Genetics. 44 (9), 1056-1059 (2012). Identifier: 19911483
ERR024083	SS-Lineage III_(2)	Shigella sonnei		Holt et al. Nature Genetics. 44 (9), 1056-1059 (2012). Identifier: 19984123
ERR028692	SS-Lineage I_(2)	Shigella sonnei		Holt et al. Nature Genetics. 44 (9), 1056-1059 (2012). Identifier: 20040489
ERR024076	SS-Lineage III_(1)	Shigella sonnei		Holt et al. Nature Genetics. 44 (9), 1056-1059 (2012). Identifier: 20061309
ERR025737	SS-Lineage IV	Shigella sonnei		Holt et al. Nature Genetics. 44 (9), 1056-1059 (2012). Identifier: 259
ERR025755	SS-Lineage I_(1)	Shigella sonnei		Holt et al. Nature Genetics. 44 (9), 1056-1059 (2012). Identifier: 4474
ERR025732	SS-Lineage III_(5)	Shigella sonnei		Holt et al. Nature Genetics. 44 (9), 1056-1059 (2012). Identifier: 54210
ERR024605	SS-Lineage II_(1)	Shigella sonnei		Holt et al. Nature Genetics. 44 (9), 1056-1059 (2012). Identifier: 66470
ERR025696	SS-Lineage III_(3)	Shigella sonnei		Holt et al. Nature Genetics. 44 (9), 1056-1059 (2012). Identifier: IB2009
ERR025710	SS-Lineage III_(4)	Shigella sonnei		Holt et al. Nature Genetics. 44 (9), 1056-1059 (2012). Identifier: IB3507
ERR025689	SS-Lineage II_(2)	Shigella sonnei		Holt et al. Nature Genetics. 44 (9), 1056-1059 (2012). Identifier: IB713
AMKG00000000	SB(6)	Shigella boydii		Sahl et al. J. Clin. Microbiol. 53 (3). 951-960 (2015). Indentifier: 248-1B
AMKF00000000	SF(22)	Shigella flexneri		Sahl et al. J. Clin. Microbiol. 53 (3). 951-960 (2015). Indentifier: MT1457
AMJZ00000000	SB serotype 2(2)	Shigella boydii serotype 2		Sahl et al. J. Clin. Microbiol. 53 (3). 951-960 (2015). Indentifier: SB_08_0009
AMKA00000000	SD serotype 9(2)	Shigella dysenteriae serotype 9		Sahl et al. J. Clin. Microbiol. 53 (3). 951-960 (2015). Indentifier: SB_08_0280
AMKB00000000	SB(4)	Shigella boydii		Sahl et al. J. Clin. Microbiol. 53 (3). 951-960 (2015). Indentifier: SB_08_2671
AMKC00000000	SB serotype 2(5)	Shigella boydii serotype 2		Sahl et al. J. Clin. Microbiol. 53 (3). 951-960 (2015). Indentifier: SB_08_2675
AMKD00000000	SB(5)	Shigella boydii		Sahl et al. J. Clin. Microbiol. 53 (3). 951-960 (2015). Indentifier: SB_08_6341
AMKE00000000	SB serotype 2(4)	Shigella boydii serotype 2		Sahl et al. J. Clin. Microbiol. 53 (3). 951-960 (2015). Indentifier: SB_09_0344
SRR058486	SD(1)	Shigella dysenteriae		Sahl et al. J. Clin. Microbiol. 53 (3). 951-960 (2015). Indentifier: SB_3594-74
SRR364094	SB(2)	Shigella boydii		Sahl et al. J. Clin. Microbiol. 53 (3). 951-960 (2015). Indentifier: SB_4444-74
SRR058487	SB(1)	Shigella boydii		Sahl et al. J. Clin. Microbiol. 53 (3). 951-960 (2015). Indentifier: SB_5216-82
SRR059778	SB serotype 15(2)	Shigella boydii serotype 15		Sahl et al. J. Clin. Microbiol. 53 (3). 951-960 (2015). Indentifier: SB_965-58
AMJU00000000	SB(3)	Shigella boydii		Sahl et al. J. Clin. Microbiol. 53 (3). 951-960 (2015). Indentifier: SB_S6614
AMJX00000000	SB serotype 2(3)	Shigella boydii serotype 2		Sahl et al. J. Clin. Microbiol. 53 (3). 951-960 (2015). Indentifier: SB_S7334
SRR059777	SD serotype 2(3)	Shigella dysenteriae serotype 2		Sahl et al. J. Clin. Microbiol. 53 (3). 951-960 (2015). Indentifier: SD_155-74
SRR041665, SRR041666	SD(3)	Shigella dysenteriae		Sahl et al. J. Clin. Microbiol. 53 (3). 951-960 (2015). Indentifier: SD_1617
SRR364091	SD serotype 3(2)	Shigella dysenteriae serotype 3		Sahl et al. J. Clin. Microbiol. 53 (3). 951-960 (2015). Indentifier: SD_225-75
AMJQ00000000	SD serotype 2(4)	Shigella dysenteriae serotype 2		Sahl et al. J. Clin. Microbiol. 53 (3). 951-960 (2015). Indentifier: SD_S6205
AMJS00000000	SD(2)	Shigella dysenteriae		Sahl et al. J. Clin. Microbiol. 53 (3). 951-960 (2015). Indentifier: SD_S6554
SRR041663, SRR041664	SF(1)	Shigella flexneri		Sahl et al. J. Clin. Microbiol. 53 (3). 951-960 (2015). Indentifier: SF_2457T
SRR060519	SF(8)	Shigella flexneri		Sahl et al. J. Clin. Microbiol. 53 (3). 951-960 (2015). Indentifier: SF_2747-71
SRR060018	SF(12)	Shigella flexneri		Sahl et al. J. Clin. Microbiol. 53 (3). 951-960 (2015). Indentifier: SF_2850-71
SRR060521	SF(10)	Shigella flexneri		Sahl et al. J. Clin. Microbiol. 53 (3). 951-960 (2015). Indentifier: SF_2930-71
SRR060520	SF(9)	Shigella flexneri		Sahl et al. J. Clin. Microbiol. 53 (3). 951-960 (2015). Indentifier: SF_4343-70
SRR059780	SF(13)	Shigella flexneri		Sahl et al. J. Clin. Microbiol. 53 (3). 951-960 (2015). Indentifier: SF_CCH060
SRR060542	SF(11)	Shigella flexneri		Sahl et al. J. Clin. Microbiol. 53 (3). 951-960 (2015). Indentifier: SF_J1713/17B
SRR060016, SRR060017	SF(14)	Shigella flexneri		Sahl et al. J. Clin. Microbiol. 53 (3). 951-960 (2015). Indentifier: SF_K-1770
SRR059811	SF(2)	Shigella flexneri		Sahl et al. J. Clin. Microbiol. 53 (3). 951-960 (2015). Indentifier: SF_K-218
SRR059822	SF(5)	Shigella flexneri		Sahl et al. J. Clin. Microbiol. 53 (3). 951-960 (2015). Indentifier: SF_K-227
SRR059823	SF(4)	Shigella flexneri		Sahl et al. J. Clin. Microbiol. 53 (3). 951-960 (2015). Indentifier: SF_K-272
SRR061726, SRR061727	SF(6)	Shigella flexneri		Sahl et al. J. Clin. Microbiol. 53 (3). 951-960 (2015). Indentifier: SF_K-304
SRR066117, SRR066118, SRR066119	SF(15)	Shigella flexneri		Sahl et al. J. Clin. Microbiol. 53 (3). 951-960 (2015). Indentifier: SF_K-315
SRR061724, SRR061725	SF(16)	Shigella flexneri		Sahl et al. J. Clin. Microbiol. 53 (3). 951-960 (2015). Indentifier: SF_K-404
SRR059932	SF(7)	Shigella flexneri		Sahl et al. J. Clin. Microbiol. 53 (3). 951-960 (2015). Indentifier: SF_K-671
AMWM00000000	SF(23)	Shigella flexneri		Sahl et al. J. Clin. Microbiol. 53 (3). 951-960 (2015). Indentifier: SF_S5644
AMJP00000000	SF(17)	Shigella flexneri		Sahl et al. J. Clin. Microbiol. 53 (3). 951-960 (2015). Indentifier: SF_S5717
ANAN00000000	SF(24)	Shigella flexneri		Sahl et al. J. Clin. Microbiol. 53 (3). 951-960 (2015). Indentifier: SF_S6162
AMJT00000000	SF(18)	Shigella flexneri		Sahl et al. J. Clin. Microbiol. 53 (3). 951-960 (2015). Indentifier: SF_S6585
AMJV00000000	SF(19)	Shigella flexneri		Sahl et al. J. Clin. Microbiol. 53 (3). 951-960 (2015). Indentifier: SF_S6678
AMJW00000000	SF(20)	Shigella flexneri		Sahl et al. J. Clin. Microbiol. 53 (3). 951-960 (2015). Indentifier: SF_S6764
AMJY00000000	SF(21)	Shigella flexneri		Sahl et al. J. Clin. Microbiol. 53 (3). 951-960 (2015). Indentifier: SF_S7737
SRR059931	SF(3)	Shigella flexneri		Sahl et al. J. Clin. Microbiol. 53 (3). 951-960 (2015). Indentifier: SF_VA-6
AMKH00000000	SS(6)	Shigella sonnei		Sahl et al. J. Clin. Microbiol. 53 (3). 951-960 (2015). Indentifier: SS_08_7761
AMKI00000000	SS(7)	Shigella sonnei		Sahl et al. J. Clin. Microbiol. 53 (3). 951-960 (2015). Indentifier: SS_08_7765
AMKJ00000000	SS(8)	Shigella sonnei		Sahl et al. J. Clin. Microbiol. 53 (3). 951-960 (2015). Indentifier: SS_09_1032
AMKK00000000	SS(9)	Shigella sonnei		Sahl et al. J. Clin. Microbiol. 53 (3). 951-960 (2015). Indentifier: SS_09_2245
AMKL00000000	SS(10)	Shigella sonnei		Sahl et al. J. Clin. Microbiol. 53 (3). 951-960 (2015). Indentifier: SS_09_4962
AKNC00000000	SS(2)	Shigella sonnei		Sahl et al. J. Clin. Microbiol. 53 (3). 951-960 (2015). Indentifier: SS_3226-85
SRR065192, SRR065191	SS(3)	Shigella sonnei		Sahl et al. J. Clin. Microbiol. 53 (3). 951-960 (2015). Indentifier: SS_3233-85
SRR060743	SS(4)	Shigella sonnei		Sahl et al. J. Clin. Microbiol. 53 (3). 951-960 (2015). Indentifier: SS_4822-66
SRR041667	SS(1)	Shigella sonnei		Sahl et al. J. Clin. Microbiol. 53 (3). 951-960 (2015). Indentifier: SS_53G
AMJR00000000	SS(5)	Shigella sonnei		Sahl et al. J. Clin. Microbiol. 53 (3). 951-960 (2015). Indentifier: SS_S6513
SRR3000444	EIEC-O112ac	Escherichia coli O112ac		This study
SRR3000443	EIEC-O115	Escherichia coli O115		This study
SRR3000437	EIEC-O121	Escherichia coli O121		This study
SRR2994195	EIEC-O124(1)	Escherichia coli O124		This study
SRR3000438	EIEC-O124(2)	Escherichia coli O124		This study
SRR3020570	EIEC-O124(3)	Escherichia coli O124	M41-63T	This study
SRR3020573	EIEC-O135(1)	Escherichia coli O135		This study
SRS1206254	EIEC-O135(2)	Escherichia coli O135		This study
SRR2994198	EIEC-O136	Escherichia coli O136		This study
SRR3000440	EIEC-O143(1)	Escherichia coli O143	4608-58	This study
SRR3000441	EIEC-O143(2)	Escherichia coli O143		This study
SRR3000442	EIEC-O143(3)	Escherichia coli O143		This study
SRR2994200	EIEC-O144(1)	Escherichia coli O144		This study
SRS1206274	EIEC-O144(2)	Escherichia coli O144		This study
SRR3020571	EIEC-O152	Escherichia coli O152		This study
SRR3020572	EIEC-O164(1)	Escherichia coli O164		This study
SRR2994360	EIEC-O164(2)	Escherichia coli O164		This study
SRR2994196	EIEC-O167	Escherichia coli O167		This study
SRR3020569	EIEC-O28ac	Escherichia coli O28ac		This study
SRR3000439	EIEC-O29	Escherichia coli O29		This study
SRR2994199	EIEC-O73(1)	Escherichia coli O73		This study
SRR2994368	EIEC-O73(2)	Escherichia coli O73		This study
SRR2994369	EIEC-O73(3)	Escherichia coli O73		This study
SRS1206277	ExPEC-O25:H16	Escherichia coli O25:H16		This study
SRR2994191	SB serotype 1	Shigella boydii serotype 1	CDC# 3115-94	This study
SRR2994194	SB serotype 12	Shigella boydii serotype 12	ATCC# 12033	This study
SRR3020611	SB serotype 20	Shigella boydii serotype 20	ATCC# BAA-1247	This study
SRS1239278	SB serotype 5	Shigella boydii serotype 5	ATCC# 8704	This study
SRR2994190	SD serotype 12	Shigella dysenteriae serotype 12	ATCC# 49551	This study
SRR2994202	SD serotype 14	Shigella dysenteriae serotype 14	CDC# 3122-93	This study
SRR2994192	SD serotype 2(1)	Shigella dysenteriae serotype 2	ATCC# 9750	This study
SRR2994189	SD serotype 5	Shigella dysenteriae serotype 5	CDC# 853-58	This study
SRR2994193	SD serotype 8	Shigella dysenteriae serotype 8	ATCC# 12021	This study
ERR273809	E. fergusonii(1)	Escherichia fergusonii
ERR273803	E. fergusonii(2)	Escherichia fergusonii
SRR349662	EAEC-O104:H4	Escherichia coli O104:H4	E92/11, O104:H4
SRR349661	EAEC-O127:H27	Escherichia coli O127:H27	C43/90, O127:H27
SRR254191	EAEC-O4:H7	Escherichia coli O4:H7	F03, O4:H7
SRR254184	EHEC-O119:H11	Escherichia coli O119:H11	C186-61, O119:H11
SRR254183	EHEC-O128:H8	Escherichia coli O128:h8	C309-64, O128:H8
SRR254182	EHEC-O15:H2	Escherichia coli O15:H2	RDEC-1 O15:H2
SRR587217	EHEC-O157:H7	Escherichia coli O157:H7	O157:H7, str. Sakai (EHEC)
SRR254186	EHEC-O70:H11	Escherichia coli O70:H11	88817, O70:H11
DRR016068	EIEC(1)	Escherichia coli
DRR015910	EIEC(2)	Escherichia coli
DRR015805	EIEC(3)	Escherichia coli
DRR015804	EIEC(4)	Escherichia coli
DRR015803	EIEC(5)	Escherichia coli
DRR015802	EIEC(6)	Escherichia coli
DRR015801	EIEC(7)	Escherichia coli
DRR015800	EIEC(8)	Escherichia coli
DRR015808	EPEC	Escherichia coli
SRR254187	EPEC-O128:H2	Escherichia coli O128:H2	2254-75, O128:H2
SRR254189	EPEC-O45:H2	Escherichia coli O45:H2	A9619-c2, O45:H2
SRR254192	ExPEC-O17	Escherichia coli O17	SEQ895, O17
SRR254196	ExPEC-O31:H6	Escherichia coli O31:H6	85.1284, O31:H6
SRR933543	ExPEC(1)	Escherichia coli	QUC12
SRR933539	ExPEC(2)	Escherichia coli	QU300
SRR933537	ExPEC(3)	Escherichia coli	KN1604
ERR662779	S. enterica(1)	Salmonella enterica serovar Typhi
SRR1122714	S. enterica(2)	Salmonella enterica serovar Anatum	CDC# B1487
DRR015924	SB serotype 10	Shigella boydii serotype 10
DRR015925	SB serotype 11	Shigella boydii serotype 11
DRR015927	SB serotype 13	Shigella boydii serotype 13
DRR015928	SB serotype 14	Shigella boydii serotype 14
DRR015929	SB serotype 15(1)	Shigella boydii serotype 15
DRR015988	SB serotype 16	Shigella boydii serotype 16
DRR015989	SB serotype 17	Shigella boydii serotype 17
DRR015990	SB serotype 18	Shigella boydii serotype 18
DRR015916	SB serotype 2(1)	Shigella boydii serotype 2
DRR015917	SB serotype 3	Shigella boydii serotype 3
DRR015918	SB serotype 4	Shigella boydii serotype 4
DRR015920	SB serotype 6	Shigella boydii serotype 6
DRR015921	SB serotype 7	Shigella boydii serotype 7
DRR015922	SB serotype 8	Shigella boydii serotype 8
DRR015923	SB serotype 9	Shigella boydii serotype 9
CP00034	SD serotype 1(1)	Shigella dysenteriae serotype 1
DRR015930	SD serotype 1(2)	Shigella dysenteriae serotype 1
DRR015994	SD serotype 10	Shigella dysenteriae serotype 10
DRR015995	SD serotype 11	Shigella dysenteriae serotype 11
DRR015997	SD serotype 13	Shigella dysenteriae serotype 13
DRR015931	SD serotype 2(2)	Shigella dysenteriae serotype 2
DRR015932	SD serotype 3(1)	Shigella dysenteriae serotype 3
DRR015933	SD serotype 4	Shigella dysenteriae serotype 4
DRR015935	SD serotype 6	Shigella dysenteriae serotype 6
DRR015991	SD serotype 7	Shigella dysenteriae serotype 7
DRR015993	SD serotype 9(1)	Shigella dysenteriae serotype 9
DRR015998	SF serotype 1a	Shigella flexneri serotype 1a
DRR015999	SF serotype 1b	Shigella flexneri serotype 1b
DRR016000	SF serotype 2a	Shigella flexneri serotype 2a
DRR016001	SF serotype 2b	Shigella flexneri serotype 2b
DRR016002	SF serotype 3a	Shigella flexneri serotype 3a
DRR016003	SF serotype 3b	Shigella flexneri serotype 3b
DRR016004	SF serotype 3c	Shigella flexneri serotype 3c
DRR016005	SF serotype 4a	Shigella flexneri serotype 4a
DRR016006	SF serotype 4b	Shigella flexneri serotype 4b
DRR016007	SF serotype 5	Shigella flexneri serotype 5
DRR016008	SF serotype 6	Shigella flexneri serotype 6
ERR314485	SF(25)	Shigella flexneri
ERR477387	SS(11)	Shigella sonnei
ERR477376	SS(12)	Shigella sonnei
ERR461936	SS(13)	Shigella sonnei
ERR461929	SS(14)	Shigella sonnei
ERR200547	SS(15)	Shigella sonnei
ERR355894	STEC-O2:H6	Escherichia coli O2:H6
